# Supplementary material for: Regulation of C-type Lectin Antimicrobial Activity by a Flexible N-terminal Prosegment
Source: PubMed Central journal article supplement — J Biol Chem. 2009 Feb 20;284(8):4881–8. doi: 10.1074/jbc.M808077200 (PMC2643518; doi:10.1074/jbc.m808077200), 2009-02-20
Supplement: M808077200_1.pdf [file M808077200_1.pdf]

## Supplementary Data

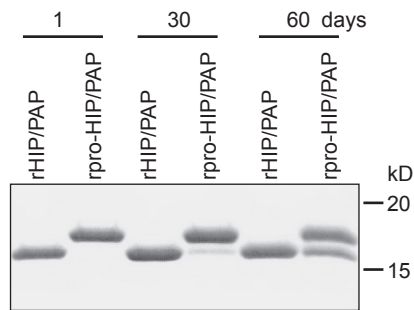

**Supplementary Figure 1: rpro-HIP/PAP undergoes N-terminal cleavage during storage.**

rpro-HIP/PAP and rHIP/PAP were purified as outlined in Materials and Methods and stored at 4°C for the indicated periods of time. 5  $\mu$ g of protein was analyzed by SDS-PAGE on a 15% gel and stained with Coomassie blue.

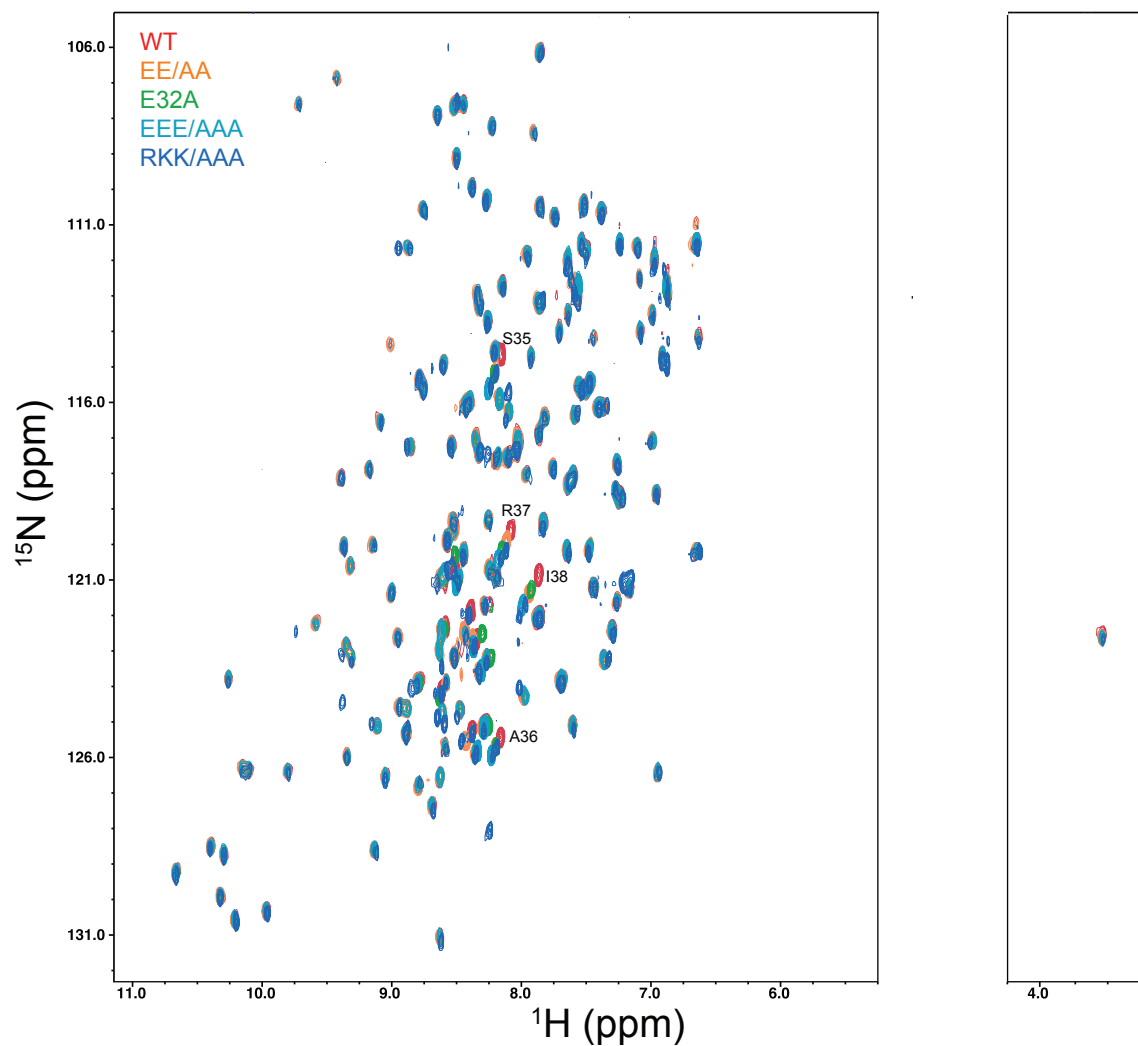

**Supplementary Figure 2. Chemical shift comparison between pro-HIP/PAP and activating pro-HIP/PAP mutants.** Superimposed  $^{15}\text{N}/^1\text{H}$  HSQC spectra of  $^{15}\text{N}$  labeled rpro-HIP/PAP and activating rpro-HIP/PAP mutations reveal colinear chemical shift perturbations among four residues surrounding the trypsin cleavage site. Detailed views are shown in Figure 5. The water signal at  $\sim 4.7$  ppm has been omitted.

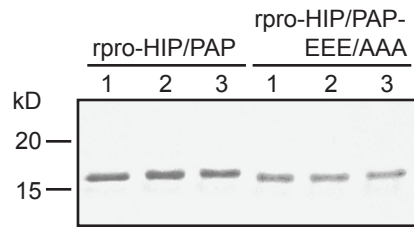

**Supplementary Figure 3: rpro-HIP/PAP is not proteolytically processed during *in vitro* bactericidal assays.** Wild-type rpro-HIP/PAP and the activated variant rpro-HIP/PAP-EEE/AAA were analyzed by SDS-PAGE following antibacterial assays with *Listeria monocytogenes* as the target organism. Assays were performed as outlined in Figure 2. 1, protein prior to incubation in the antibacterial assay; 2, protein mock-incubated at 37°C for 2 hours; 3, protein after a 2 hour incubation in antibacterial assays. The results indicate that activating rpro-HIP/PAP mutations do not result in proteolytic processing during antibacterial assays.
